# Supplementary material for: Rice miR172 induces flowering by suppressing OsIDS1 and SNB, two AP2 genes that negatively regulate expression of Ehd1 and florigens
Source: PubMed Central journal article supplement (PMC4884018; doi:10.1186/s12284-014-0031-4), 2014-11-19
Supplement: 12284_2014_31_MOESM2_ESM.pdf [file 12284_2014_31_MOESM2_ESM.pdf]

**Additional files 2:**

**Table S1.** Sequences of primers used in this study

**Table S1.** Sequences of primers used in this study

| Primer name                | Gene              | Sequence                         |
|----------------------------|-------------------|----------------------------------|
| <b>Primers for qRT-PCR</b> |                   |                                  |
| Ubi-RT-F                   | <i>Ubiquitin1</i> | 5'-AACCAGCTGAGGCCCAAGA-3'        |
| Ubi-RT-R                   |                   | 5'-ACGATTGATTTAACCAGTCCATGA-3'   |
| pri-miR172a-RT-F           | <i>miR172a</i>    | 5'-CGTGGCATCATCAAGATTCACATC-3'   |
| pri-miR172a-RT-R           |                   | 5'-CAAGATTCTCAGCCAAATCGGATG-3'   |
| pri-miR172d-RT-F           | <i>miR172d</i>    | 5'-ACAGTCGGTGCTTGCAGGTG-3'       |
| pri-miR172d-RT-R           |                   | 5'-TCACATATAGTCAGCCAACCTCG-3'    |
| SNB-RT-F                   | <i>SNB</i>        | 5'-ATGGAAGGGAAGCTGTTAC-3'        |
| SNB-RT-R                   |                   | 5'-AATGTGGATGCTGGGACATC-3'       |
| OsIDS1-RT-F                | <i>OsIDS1</i>     | 5'-CTGGCCTCCAGTTAACTTGT-3'       |
| OsIDS1-RT-R                |                   | 5'-GGCGCCGGCAGAGAATCCT-3'        |
| tSNB-RT-F                  | <i>tSNB</i>       | 5'-GTCCCCAGTCGTTCCCTACT-3'       |
| tSNB-RT-R                  |                   | 5'-CCATCTCATAAATAACGTCATGC-3'    |
| tOsIDS1-RT-F               | <i>tOsIDS1</i>    | 5'-ACTGCCCCCTCAGCATCAAC-3'       |
| tOsIDS1-RT-R               |                   | 5'-GAACTTCAGGGTCAGCTTGCC-3'      |
| OsTOE1-RT-F                | <i>OsTOE1</i>     | 5'-GATGCATCCAGATCATCGGA-3'       |
| OsTOE1-RT-R                |                   | 5'-AGACTAGGAGCATTGGAAC-3'        |
| OsGI-RT-F                  | <i>OsGI</i>       | 5'-ATCGTTCTGCAGGCCGAGA-3'        |
| OsGI-RT-R                  |                   | 5'-TCACCAATGCTTCTGGGCTAT-3'      |
| Hd1-RT-F                   | <i>Hd1</i>        | 5'-TCAGCAACAGCATATCTTTCTCATCA-3' |
| Hd1-RT-R                   |                   | 5'-TCTGGAATTTGGCATATCTATCACC-3'  |
| Ehd1-RT-F                  | <i>Ehd1</i>       | 5'-TGCAAATGGCGCTTTTGAT-3'        |
| Ehd1-RT-R                  |                   | 5'-ATATGTGCTGCCAAATGTTGCT-3'     |
| Hd3a-RT-F                  | <i>Hd3a</i>       | 5'-GCTCACTATCATCATCCAGCATG-3'    |
| Hd3a-RT-R                  |                   | 5'-CCTTGCTCAGCTATTTAATTGCATAA-3' |
| RFT1-RT-F                  | <i>RFT1</i>       | 5'-TGACCTAGATTCAAAGTCTAATCCTT-3' |
| RFT1-RT-R                  |                   | 5'-TGCCGGCCATGTCAAATTAATAAC-3'   |
| OsPhyB-RT-F                | <i>OsPhyB</i>     | 5'-ATGGAACAGACACAATGCTT-3'       |
| OsPhyB-RT-R                |                   | 5'-AGCATAACCATATCAGCTT-3'        |
| Ghd7-RT-F                  | <i>Ghd7</i>       | 5'-ATATTGTGGGAGCACGTT-3'         |
| Ghd7-RT-R                  |                   | 5'-ATCTGAACCATTGTCCAAGC-3'       |
| OsId1-RT-F                 | <i>OsId1</i>      | 5'-CCTCTTCTCCAGGAAGGACA -3'      |
| OsId1-RT-R                 |                   | 5'-GCTGCTGGTGATCAGAAGATT-3'      |
| OsMADS50-RT-F              | <i>OsMADS50</i>   | 5'-AAAGCTGACGCTGATGGTTTG-3'      |
| OsMADS50-RT-R              |                   | 5'-GTTTCGACATCCATGTTGTC-3'       |
| OsMADS51-RT-F              | <i>OsMADS51</i>   | 5'-GTTTGCTCTGCTCCTACTC-3'        |
| OsMADS51-RT-R              |                   | 5'-ACTCCTCCTCCAGCATTGAA-3'       |
| OsMADS56-RT-F              | <i>OsMADS56</i>   | 5'-GACCGCTATAAAGCATAACACA-3'     |
| OsMADS56-RT-R              |                   | 5'-TCATGTGGTTAGCCACCAGC-3'       |
| OsCOL4-RT-F                | <i>OsCOL4</i>     | 5'-ATCCACTCGGCGAACCCGCT -3'      |
| OsCOL4-RT-R                |                   | 5'-CGCTTCTCCCTGTACCGCAT-3'       |
| OsCO3-RT-F                 | <i>OsCO3</i>      | 5'-GGAGAAGAGGAAGACGAGGC-3'       |
| OsCO3-RT-R                 |                   | 5'-TAGCTAAGCAACCAAGATGTA-3'      |
| Ehd3-RT-F                  | <i>Ehd3</i>       | 5'-GGACCACCTCGTCACCTACAA-3'      |
| Ehd3-RT-R                  |                   | 5'-CGCCGTTGGCCATGAG-3'           |
| OsTrx1-RT-F                | <i>OsTrx1</i>     | 5'-GGTCACATCAGAAGATGGAA-3'       |

|             |               |                             |
|-------------|---------------|-----------------------------|
| OsTrx1-RT-R |               | 5'-CACCATAGCATCTAGCATGTA-3' |
| OsVIL2-RT-F | <i>OsVIL2</i> | 5'-CGGAAACAGAATGATCTGCTT-3' |
| OsVIL2-RT-R |               | 5'-GAAGTTTGATGGTATCATCCG-3' |

---

**Primers for cloning**

---

|             |                |                                     |
|-------------|----------------|-------------------------------------|
| SNB-FL-F    | <i>SNB</i>     | 5'-gctctagaATGGTGCTGGAT-3'          |
| SNB-FL-R    |                | 5'-tctcgagGGCGGTCGGGGGGA-3'         |
| OsIDS1-FL-F | <i>OsIDS1</i>  | 5'-ctctagaATGTTGTTGGATCT-3'         |
| OsIDS1-FL-R |                | 5'-tctcgagGGCGGTTGGCGGGA-3'         |
| rSNB-N-F    | <i>rSNB</i>    | 5'-gctctagaATGGTGCTGGAT-3'          |
| rSNB-N-R    |                | 5'-GTAGAGAAAtccggaACTTGCTGCAGTAG-3' |
| rSNB-C-F    |                | 5'-CTACTGCAGCAAGTtccggaTTCTCTAC-3'  |
| rSNB-C-R    |                | 5'-tctcgagGGCGGTCGGGGGGA-3'         |
| rOsIDS1-N-F | <i>rOsIDS1</i> | 5'-ctctagaATGTTGTTGGATCT-3'         |
| rOsIDS1-N-R |                | 5'-CAGAGAAAtccggaACTTGCTGCAGCG-3'   |
| rOsIDS1-C-F |                | 5'-CGCTGCAGCAAGTtccggaTTCTCTG-3'    |
| rOsIDS1-C-R |                | 5'-tctcgagGGCGGTTGGCGGGA-3'         |
| rSNB-FL-F   | <i>rSNB</i>    | 5'-cgtaacATGGTGCTGGATCTCA-3'        |
| rSNB-FL-R   |                | 5'-tgtacaTCAGGCGGTCGGGG-3'          |
| Ehd1-FL-F   | <i>Ehd1</i>    | 5'-acgcgtATGGATCACCGAGAGC-3'        |
| Ehd1-FL-R   |                | 5'-gttaacCTAGAAATTCCAAAAAC-3'       |

---
